# Supplementary material for: Foraging for high caloric anthropogenic prey is energetically costly
Source: PubMed Central journal article supplement (PMC6533676; doi:10.1186/s40462-019-0159-3), 2019-05-24
Supplement: 40462_2019_159_MOESM1_ESM.pdf [file 40462_2019_159_MOESM1_ESM.pdf]

1 **Additional file 1**

2 **Table S1** Habitat types and shapefiles used in the analysis.

| Habitat                  | Shapefile                                                                                                                                |
|--------------------------|------------------------------------------------------------------------------------------------------------------------------------------|
| North Sea and Wadden Sea | GDAM January 2012 European boundaries polygon (Hijmans, 2012)                                                                            |
| Urban areas              | OpenStreetMap data (OpenStreetMap contributors, 2017)<br>CORINE Urban morphological zones 2006 (European Environment Agency (EEA), 2017) |
| Beach                    | LGN5 (Landelijke Grondgebruikskartering 5) (Hazeu, 2005)                                                                                 |
| Breakwaters              | Delineated based on QGIS openlayer plugin google earth (QGIS Development Team, 2009)                                                     |
| Tidal flats              | Rijkswaterstaat ( <a href="http://www.rijkswaterstaat.nl">http://www.rijkswaterstaat.nl</a> )                                            |
| Agricultural and natural | OpenStreetMap data (OpenStreetMap contributors, 2017)<br>Netherlands Natural Features shapefile (MapCruzin, 2017)                        |

3

4 **Table S2** Average number of foraging trips per individual bird ID per habitat category and the total  
 5 number of trips per day. The table is ordered in ascending order of total number of trips per day. The  
 6 highest value per individual (favored habitat category) is underlined.

| Bird ID | Average number of trips per day |               |                   |                    |              | Total |
|---------|---------------------------------|---------------|-------------------|--------------------|--------------|-------|
|         | <i>Urban</i>                    | <i>Marine</i> | <i>Intertidal</i> | <i>Terrestrial</i> | <i>Mixed</i> |       |
| 6217    | <u>0.72</u>                     | 0.31          | <u>0.72</u>       | <u>0.72</u>        | 0.62         | 3.10  |
| 6206    | 0.96                            | 0.48          | <u>1.44</u>       | 0.24               | 0.72         | 3.83  |
| 1600    | 0.00                            | 0.91          | <u>2.73</u>       | 0.13               | 0.13         | 3.90  |
| 6004    | 0.56                            | 0.42          | <u>1.25</u>       | 1.11               | 0.56         | 3.90  |
| 6006    | <u>1.95</u>                     | 0.00          | 0.43              | 1.19               | 0.33         | 3.90  |
| 6009    | 0.00                            | 0.42          | 1.58              | <u>2.00</u>        | 0.00         | 4.00  |
| 6076    | 0.10                            | 0.50          | <u>1.80</u>       | 0.90               | 0.70         | 4.00  |
| 6073    | 0.00                            | 0.99          | 1.44              | <u>1.66</u>        | 0.11         | 4.20  |
| 6080    | <u>1.56</u>                     | 0.78          | 0.39              | 1.17               | 0.39         | 4.29  |
| 6014    | 0.80                            | <u>1.60</u>   | 0.40              | 1.00               | 0.60         | 4.40  |
| 6205    | 0.00                            | 0.39          | <u>2.70</u>       | 0.64               | 0.77         | 4.50  |
| 6210    | 1.07                            | 0.59          | <u>2.13</u>       | 0.36               | 0.36         | 4.50  |
| 6202    | 1.02                            | 0.87          | <u>1.60</u>       | 0.87               | 0.44         | 4.80  |
| 6015    | <u>1.61</u>                     | 1.38          | 0.69              | 1.15               | 0.00         | 4.83  |
| 6071    | 0.00                            | 0.83          | <u>2.50</u>       | 1.04               | 0.52         | 4.90  |
| 6016    | 0.05                            | 0.56          | <u>3.63</u>       | 0.87               | 0.31         | 5.42  |
| 6208    | 0.00                            | 0.63          | <u>4.28</u>       | 0.32               | 0.48         | 5.70  |

7

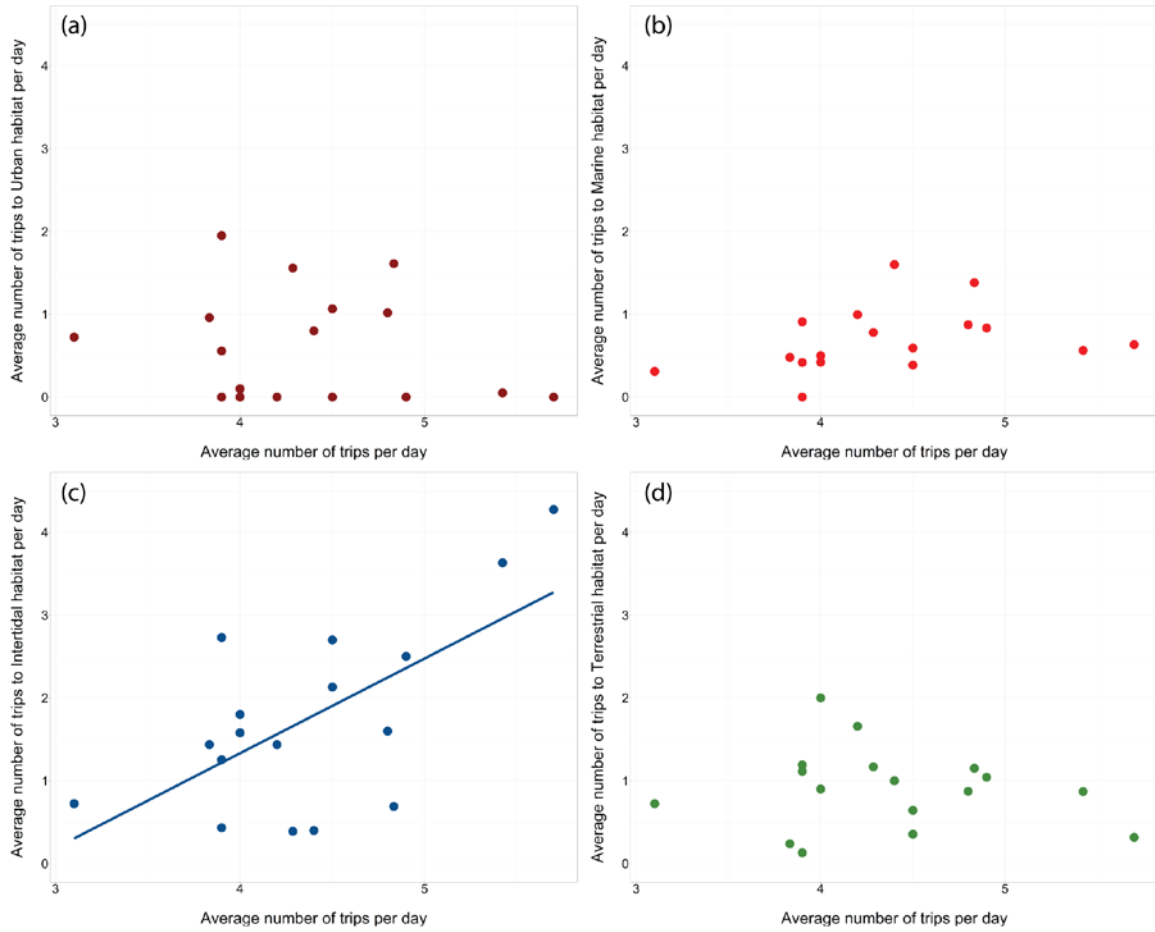

8

9 **Figure S1** Relationship between average number of trips per day on the x-axis and average number of  
 10 trips to the specific habitats per day per bird ID on the y-axis per bird-ID. Every point represents one  
 11 Bird ID. Figures (a)-(d) show average trips per day against average trips to (a) urban habitat, (b) marine  
 12 habitat, (c) intertidal habitat and (d) terrestrial habitat. Only the relationship between average number  
 13 of trips per day and average number of trips to intertidal habitat is statistically significant (linear model  
 14 intercept=  $3.74 \pm 0.23$ , estimates =  $0.36 \pm 0.11$ ,  $p=0.006$ ,  $R^2=0.37$ ).

15
